# Supplementary material for: Human iPSC-derived alveolar macrophages reveal macrophage subtype functions of itaconate in M. tuberculosis defense
Source: JCI journal article supplement (doi:10.1172/jci.insight.198342), 2026-03-09

6A

Vinculin

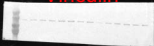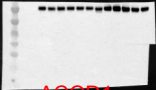

ACOD1

# Panel 6C

Vinculin

unrelated lanes

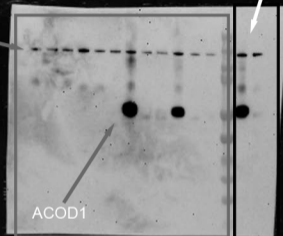

ACOD1

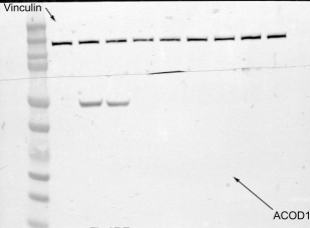

Fig 6F Top

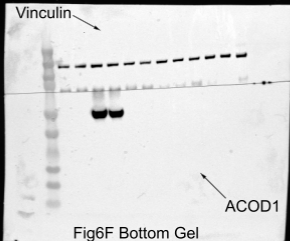

Fig 6G

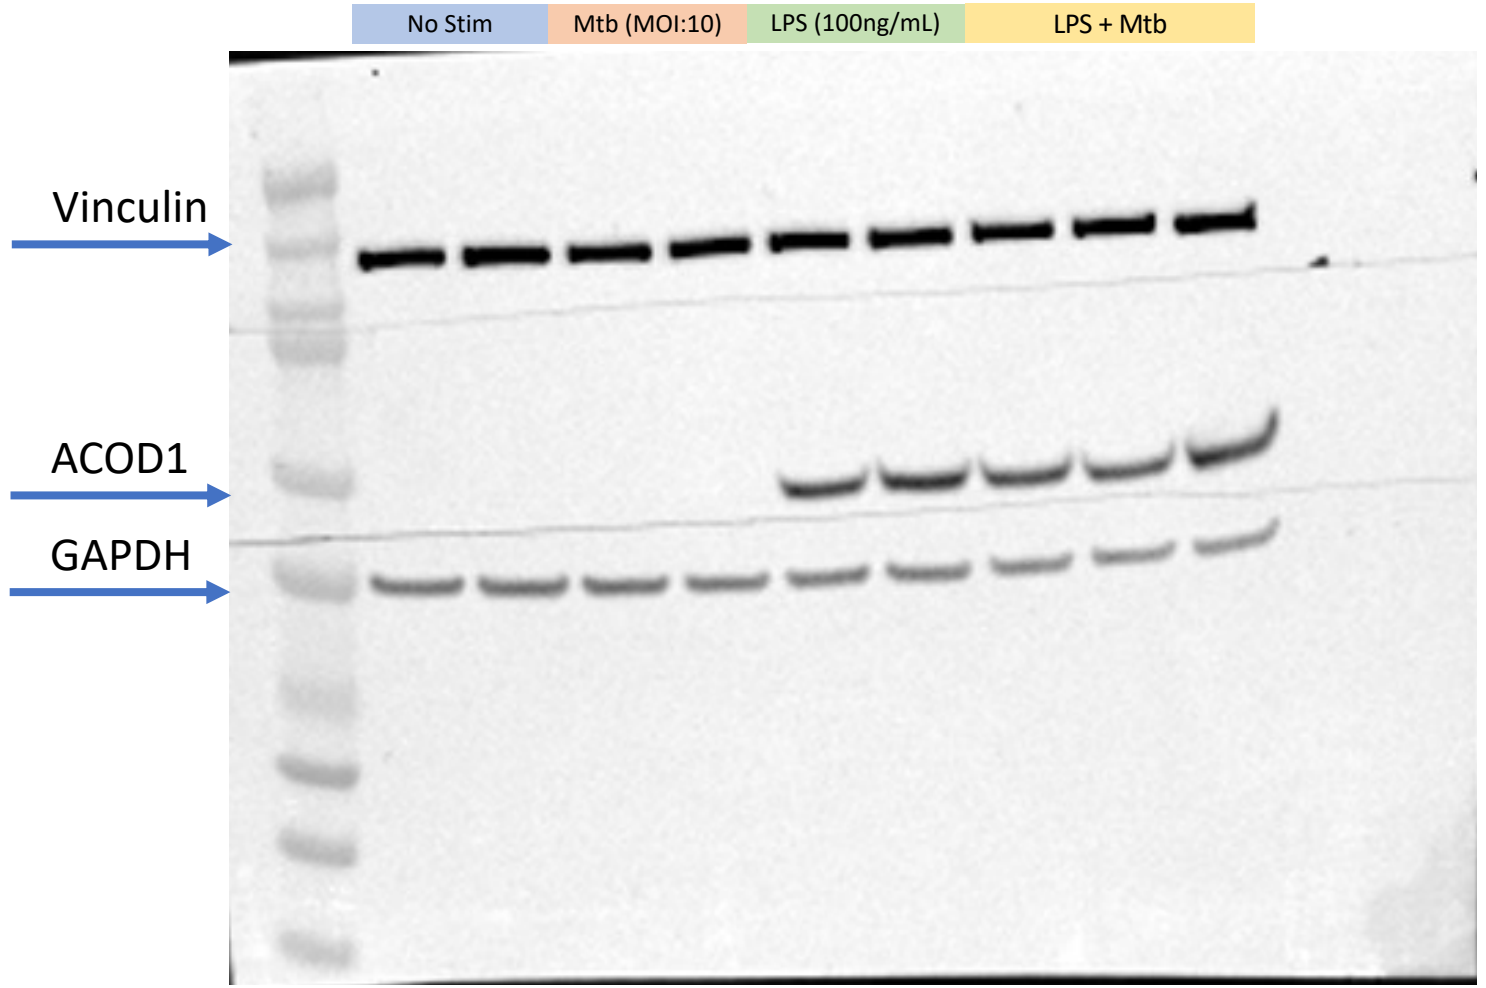

Supplement: sd2 [file 2]
